# Supplementary material
Source: Copernicus journal article supplement (doi:10.5194/nhess-26-2031-2026)
Supplement: Supplementary file 1 [file nhess-26-2031-2026-supplement.pdf]

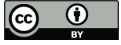

*Supplement of*

## **Non-stationary dynamics of compound climate extremes: a WRF-CMIP6-GAMLSS framework for southeastern China**

**Yinchi Zhang et al.**

*Correspondence to:* Lu Gao ([l.gao@foxmail.com](mailto:l.gao@foxmail.com))

The copyright of individual parts of the supplement might differ from the article licence.

## 1 **Methods**

### 2 S1. Empirical Mode Decomposition (EMD)

3 Empirical Mode Decomposition (EMD) is a data-driven technique used to decompose a signal  
4 into a set of intrinsic mode functions (IMFs) and a residual trend (Huang et al., 1998). It is  
5 particularly suitable for analyzing nonlinear and non-stationary time series data. Many studies have  
6 shown that the residuals of EMD can reflect the deterministic trend of non-stationary sequences (Lee  
7 and Ouarda, 2010; Qian, 2016; Wu et al., 2023). In this study, the EMD is applied to quantify the  
8 deterministic trends in the recurrence hazards of compound extreme events. The formula is as  
9 follows:

$$10 \quad x(t) = \sum_{i=1}^n IMF_i(t) + r_n(t)$$

11  $x(t)$  is the original signal.  $IMF_i(t)$  represents the  $i$ -th intrinsic mode function, which is the result  
12 of the decomposition.  $r_n(t)$  is the residual (a trend or constant component left after the  
13 decomposition). Typically, it is a constant or a slowly varying trend.

## 14 **Results**

### 15 S1 Assessing the regional applicability of downscaled CMIP6bc based on historical data

16 Although the quality of CMIP6bc has been widely validated across China, a regional  
17 applicability assessment remains necessary. Table S3 presents the specific information for each  
18 station, Table S4 and S5 show the simulated temperature results from CMIP6bc and ERA5, and  
19 Table S6 and S7 display the simulated precipitation results. The spatial patterns of precipitation and  
20 temperature (Figures S1 a–f) are constructed by performing spline interpolation on the observed data  
21 from the 30 stations in the MRB using Arc Geographic Information System (ArcGIS). It represents  
22 the interpolated annual mean values at each meteorological station and the nearest WRF grid point  
23 over the 10-year historical period. To eliminate the interpolation errors, we extracted the nearest  
24 WRF grid points for each meteorological station and compared them by plotting a Taylor diagram  
25 (Figures S1 i–l). We evaluate the simulation performance of precipitation and temperature using  
26 Correlation Coefficient (CC), Percent Bias (PBIAS), Root Mean Square Error (RMSE), and  
27 Standard Deviation (STD) (Table S8). CC and PBIAS represent the averages across all stations,  
28 whereas in the Taylor diagrams, CC, RMSE, and STD are calculated based on the nearest WRF grid  
29 point to each station. Compared to observations, both the downscaled ERA5 and CMIP6bc  
30 demonstrated satisfactory performance in reproducing the spatio-temporal distribution

31 characteristics of precipitation and temperature across the MRB. Specifically, the ERA5-based  
32 simulations outperform CMIP6bc, particularly for precipitation (CC = 0.88, PBIAS = 3.79%)  
33 compared to temperature (CC = 0.80; PBIAS = 4.03%). However, the models demonstrate consistent  
34 underestimations in the downstream areas and overestimations in the northwestern Wuyi Mountain  
35 region. These systematic biases are likely attributable to orographic effects, with the WRF model  
36 consistently underestimating precipitation in plain areas while overestimating it in high-elevation  
37 regions (Wang et al., 2020; Min et al., 2021). As shown in Figures S1 (g, h), the results from both  
38 driving datasets capture the observed temporal variations, with temperature simulations showing  
39 better agreement than precipitation. The Taylor diagrams reveal that the WRF model's performance  
40 is comparatively weaker in the downstream sub-basin of the MRB than the other three sub-basins.  
41 High-altitude areas typically experience stronger radiation effects, especially in mountainous regions  
42 with thinner atmospheres. The WRF model may have errors in simulating radiation transfer, leading  
43 to temperatures in high-altitude areas being lower than actual conditions (Varga et al., 2020). In  
44 addition, the downstream area of the MRB is an urban agglomeration, where urban areas typically  
45 experience stronger radiation and heat accumulation effects. These effects may not be fully  
46 accounted for in the model, leading to simulated temperatures being higher than actual conditions  
47 (Chen et al., 2025). In summary, although CMIP6bc underperforms ERA5 due to resolution  
48 limitations, it still exhibits reasonable spatio-temporal consistency with the observations. We  
49 conclude that such discrepancies remain within an acceptable range for subsequent research.

50 S2 WRF parametrization scheme sensitivity experiments.

51 In our previous study, we conducted a detailed sensitivity analysis and optimization of  
52 parameterization schemes specifically for the MRB (Lin et al., 2023). We focused on two schemes  
53 that have the most significant impact on precipitation: microphysics and cumulus convection. By  
54 cross-combining these schemes, we developed 16 combinations (as shown in Table S9) and assessed  
55 their performance in simulating precipitation across different magnitudes. Through a comprehensive  
56 evaluation of the temporal (Figure S2 and Figure S3) and spatial (Figure S4 and Table S10)  
57 characteristics, we determined that the 9th configuration (Lin and NT) is the most suitable for  
58 simulating extreme precipitation events in the MRB. As a result, this configuration was adopted in  
59 the present study to ensure the most accurate simulation of extreme precipitation events in this region.

60 **Table**

61 Table S1 CMIP6 models used in CMIP6bc.

| No. | Model         | Institution                                                                                 | Approximate grid spacing         |
|-----|---------------|---------------------------------------------------------------------------------------------|----------------------------------|
| 1   | ACCESS-CM2    | Commonwealth Scientific and Industrial Research Organisation (Australia)                    | $1.875^\circ \times 1.25^\circ$  |
| 2   | ACCESS-ESM1-5 | Commonwealth Scientific and Industrial Research Organisation (Australia)                    | $1.875^\circ \times 1.25^\circ$  |
| 3   | CanESM5       | Canadian Centre for Climate Modelling and Analysis (Canada)                                 | $2.81^\circ \times 2.81^\circ$   |
| 4   | BCC-CSM2-MR   | Beijing Climate Center (China)                                                              | $1.125^\circ \times 1.125^\circ$ |
| 5   | FGOALS-f3-L   | Institute of Atmospheric Physics, Chinese Academy of Sciences (China)                       | $1.25^\circ \times 1^\circ$      |
| 6   | FGOALS-g3     | Institute of Atmospheric Physics, Chinese Academy of Sciences (China)                       | $2^\circ \times 2.25^\circ$      |
| 7   | EC-Earth3     | European EC-Earth Consortium (Europe)                                                       | $0.70^\circ \times 0.70^\circ$   |
| 8   | EC-Earth3-Veg | European EC-Earth Consortium (Europe)                                                       | $0.70^\circ \times 0.70^\circ$   |
| 9   | IPSL-CM6A-LR  | Institute Pierre Simon Laplace (France)                                                     | $2.5^\circ \times 1.26^\circ$    |
| 10  | AWI-CM-1-1-MR | Alfred Wegener Institute, Helmholtz Centre for Polar and Marine Research (Germany)          | $0.94^\circ \times 0.94^\circ$   |
| 11  | MPI-ESM1-2-HR | Max Planck Institute for Meteorology (Germany)                                              | $0.94^\circ \times 0.94^\circ$   |
| 12  | MPI-ESM1-2-LR | Max Planck Institute for Meteorology (Germany)                                              | $1.875^\circ \times 1.875^\circ$ |
| 13  | MIROC6        | Japan Agency for Marine-Earth Science and Technology (Japan)                                | $1.41^\circ \times 1.41^\circ$   |
| 14  | MRI-ESM2-0    | Meteorological Research Institute, Japan Meteorological Agency (Japan)                      | $1.125^\circ \times 1.125^\circ$ |
| 15  | NorESM2-LM    | Norwegian Climate Center (Norway)                                                           | $2.5^\circ \times 1.875^\circ$   |
| 16  | CESM2         | Climate and Global Dynamics Laboratory, National Center for Atmospheric Research (USA)      | $1.25^\circ \times 0.94^\circ$   |
| 17  | CESM2-WACCM   | Climate and Global Dynamics Laboratory, National Center for Atmospheric Research (USA)      | $1.25^\circ \times 0.94^\circ$   |
| 18  | GFDL-ESM4     | Geophysical Fluid Dynamics Laboratory, National Oceanic and Atmosphere Administration (USA) | $1.25^\circ \times 1.0^\circ$    |

63 Table S2 Distribution functions in this study.

| Distribution function   | Abbreviation        | Number of parameters |
|-------------------------|---------------------|----------------------|
| Gamma                   | GA                  | 2                    |
| Gumbel                  | GU                  | 2                    |
| Inverse Gamma           | IGAMMA              | 2                    |
| Inverse Gaussian        | IG                  | 2                    |
| Logistic                | LO                  | 2                    |
| Log-Normal              | LOGNO               | 2                    |
| Reverse Gumbel          | RG                  | 2                    |
| Weibull                 | WEIB                | 2                    |
| Normal                  | NO                  | 2                    |
| Exponential gen. beta 2 | EGB2                | 4                    |
| Johnson's SU repar.     | JSU                 | 4                    |
| Johnson's original SU   | JSU <sub>o</sub>    | 4                    |
| Generalised t           | GT                  | 4                    |
| SU                      | SU                  | 4                    |
| NET                     | NET                 | 4                    |
| Sinh-arcsinh            | SHASH               | 4                    |
| Sinh-arcsinh original   | SHASH <sub>o</sub>  | 4                    |
| Sinh-arcsinh original 2 | SHASH <sub>o2</sub> | 4                    |

65 Table S3 Meteorological stations information.

| ID | Name        | Longitude (°N) | Latitude (°E) | Elevation (m) |
|----|-------------|----------------|---------------|---------------|
| 1  | Jiuxianshan | 118.1          | 25.72         | 1653.5        |
| 2  | Gutian      | 118.73         | 26.58         | 361.5         |
| 3  | Datian      | 117.83         | 25.7          | 400.1         |
| 4  | Youxi       | 118.15         | 26.17         | 126.1         |
| 5  | Dehua       | 118.23         | 25.48         | 521.4         |
| 6  | Yongtai     | 118.93         | 25.87         | 85.6          |
| 7  | Fuzhou      | 119.28         | 26.08         | 83.8          |
| 8  | Changle     | 119.5          | 25.97         | 4.1           |
| 9  | Minhou      | 119.15         | 26.15         | 57.8          |
| 10 | Minqing     | 118.85         | 26.23         | 40.8          |
| 11 | Sanming     | 117.62         | 26.27         | 215           |
| 12 | Ninghua     | 116.63         | 26.23         | 358.9         |
| 13 | Yongan      | 117.35         | 25.97         | 206           |
| 14 | Shaxian     | 117.8          | 26.4          | 120.6         |
| 15 | Qingliu     | 116.85         | 26.2          | 310.6         |
| 16 | Liancheng   | 116.75         | 25.72         | 380.0         |
| 17 | Guangze     | 117.3          | 27.52         | 265.4         |
| 18 | Nanping     | 118.17         | 26.65         | 125.6         |
| 19 | Jiangle     | 117.47         | 26.73         | 154.7         |
| 20 | Jianning    | 116.85         | 26.83         | 342.3         |
| 21 | Shaxi       | 117.15         | 26.4          | 357.4         |
| 22 | Taining     | 117.17         | 26.9          | 342.9         |
| 23 | Shaowu      | 117.47         | 27.33         | 191.5         |
| 24 | Shunchang   | 117.8          | 26.8          | 175.2         |
| 25 | Jianou      | 118.31         | 27.05         | 154.9         |
| 26 | Jianyang    | 118.12         | 27.33         | 196.9         |
| 27 | Zhenghe     | 118.82         | 27.37         | 221.5         |
| 28 | Songxi      | 118.8          | 27.52         | 205.4         |
| 29 | Wuyishan    | 118.03         | 27.77         | 220.6         |
| 30 | Pucheng     | 118.53         | 27.92         | 276.9         |

67 Table S4 Temperature simulation results based on ERA5

| Station     | STD  | RMSE | CC   |
|-------------|------|------|------|
| Jiuxianshan | 1.14 | 0.59 | 0.99 |
| Gutian      | 0.98 | 0.29 | 0.99 |
| Datian      | 0.97 | 0.07 | 1.00 |
| Youxi       | 0.99 | 0.23 | 0.99 |
| Dehua       | 0.98 | 0.20 | 0.99 |
| Yongtai     | 1.00 | 0.22 | 0.99 |
| Fuzhou      | 0.97 | 0.26 | 0.98 |
| Changle     | 0.92 | 0.20 | 0.98 |
| Minhou      | 0.97 | 0.35 | 0.95 |
| Minqing     | 0.98 | 0.16 | 0.99 |
| Sanming     | 1.03 | 0.30 | 0.99 |
| Ninghua     | 0.99 | 0.12 | 0.99 |
| Yongan      | 1.01 | 0.32 | 0.99 |
| Shaxian     | 1.03 | 0.36 | 0.99 |
| Qingliu     | 0.96 | 0.14 | 0.99 |
| Liancheng   | 1.01 | 0.27 | 0.99 |
| Guangze     | 1.01 | 0.19 | 0.99 |
| Nanping     | 1.02 | 0.29 | 0.99 |
| Jiangle     | 1.02 | 0.29 | 0.99 |
| Jianning    | 1.02 | 0.19 | 0.99 |
| Shaxi       | 0.97 | 0.26 | 0.99 |
| Taining     | 0.99 | 0.21 | 0.99 |
| Shaowu      | 1.03 | 0.31 | 0.99 |
| Shunchang   | 1.03 | 0.32 | 0.99 |
| Jianou      | 0.78 | 0.25 | 0.99 |
| Jianyang    | 0.75 | 0.36 | 0.99 |
| Zhenghe     | 1.01 | 0.14 | 0.99 |
| Songxi      | 0.99 | 0.14 | 0.99 |
| Wuyishan    | 0.82 | 0.27 | 1.00 |
| Pucheng     | 1.05 | 0.26 | 0.99 |

69 Table S5 Temperature simulation results based on CMIP6bc

| Station     | STD  | RMSE | CC   |
|-------------|------|------|------|
| Jiuxianshan | 1.10 | 0.66 | 0.96 |
| Gutian      | 0.96 | 0.37 | 0.97 |
| Datian      | 0.94 | 0.29 | 0.96 |
| Youxi       | 0.95 | 0.30 | 0.96 |
| Dehua       | 0.97 | 0.30 | 0.96 |
| Yongtai     | 0.96 | 0.29 | 0.96 |
| Fuzhou      | 0.96 | 0.32 | 0.96 |
| Changle     | 0.88 | 0.28 | 0.96 |
| Minhou      | 0.53 | 0.68 | 0.96 |
| Minqing     | 0.94 | 0.27 | 0.96 |
| Sanming     | 0.97 | 0.37 | 0.96 |
| Ninghua     | 0.93 | 0.25 | 0.97 |
| Yongan      | 0.95 | 0.30 | 0.96 |
| Shaxian     | 0.96 | 0.33 | 0.97 |
| Qingliu     | 0.91 | 0.26 | 0.97 |
| Liancheng   | 0.93 | 0.32 | 0.96 |
| Guangze     | 0.96 | 0.28 | 0.98 |
| Nanping     | 0.98 | 0.37 | 0.97 |
| Jiangle     | 0.95 | 0.27 | 0.97 |
| Jianning    | 0.96 | 0.28 | 0.98 |
| Shaxi       | 0.92 | 0.33 | 0.97 |
| Taining     | 0.94 | 0.28 | 0.97 |
| Shaowu      | 0.95 | 0.27 | 0.97 |
| Shunchang   | 0.95 | 0.30 | 0.97 |
| Jianou      | 0.79 | 0.32 | 0.97 |
| Jianyang    | 0.73 | 0.41 | 0.97 |
| Zhenghe     | 0.95 | 0.25 | 0.97 |
| Songxi      | 0.94 | 0.25 | 0.97 |
| Wuyishan    | 0.81 | 0.35 | 0.97 |
| Pucheng     | 0.95 | 0.24 | 0.98 |

71 Table S6 Precipitation simulation results based on ERA5

| Station     | STD  | RMSE | CC   |
|-------------|------|------|------|
| Jiuxianshan | 1.20 | 0.71 | 0.80 |
| Gutian      | 1.13 | 0.55 | 0.87 |
| Datian      | 1.20 | 0.71 | 0.81 |
| Youxi       | 1.35 | 0.72 | 0.86 |
| Dehua       | 1.16 | 0.64 | 0.83 |
| Yongtai     | 1.04 | 0.69 | 0.78 |
| Fuzhou      | 0.94 | 0.75 | 0.74 |
| Changle     | 0.76 | 0.89 | 0.62 |
| Minhou      | 1.04 | 0.79 | 0.73 |
| Minqing     | 1.10 | 0.65 | 0.81 |
| Sanming     | 0.98 | 0.61 | 0.81 |
| Ninghua     | 1.18 | 0.74 | 0.78 |
| Yongan      | 1.12 | 0.61 | 0.84 |
| Shaxian     | 0.97 | 0.56 | 0.84 |
| Qingliu     | 1.16 | 0.72 | 0.79 |
| Liancheng   | 1.36 | 0.89 | 0.75 |
| Guangze     | 1.24 | 0.51 | 0.92 |
| Nanping     | 0.97 | 0.53 | 0.85 |
| Jiangle     | 1.07 | 0.45 | 0.91 |
| Jianning    | 1.12 | 0.69 | 0.79 |
| Shaxi       | 1.01 | 0.57 | 0.84 |
| Taining     | 1.11 | 0.46 | 0.91 |
| Shaowu      | 1.35 | 0.82 | 0.80 |
| Shunchang   | 1.06 | 0.51 | 0.88 |
| Jianou      | 0.96 | 0.54 | 0.85 |
| Jianyang    | 0.99 | 0.46 | 0.89 |
| Zhenghe     | 1.06 | 0.44 | 0.91 |
| Songxi      | 1.17 | 0.55 | 0.89 |
| Wuyishan    | 1.23 | 0.48 | 0.93 |
| Pucheng     | 1.06 | 0.59 | 0.84 |

73 Table S7 Precipitation simulation results based on CMIP6bc

| Station     | STD  | RMSE | CC   |
|-------------|------|------|------|
| Jiuxianshan | 1.19 | 0.98 | 0.61 |
| Gutian      | 1.12 | 0.92 | 0.63 |
| Datian      | 1.38 | 1.05 | 0.65 |
| Youxi       | 1.11 | 0.85 | 0.68 |
| Dehua       | 1.06 | 0.83 | 0.69 |
| Yongtai     | 0.94 | 0.97 | 0.52 |
| Fuzhou      | 0.94 | 0.94 | 0.57 |
| Changle     | 0.82 | 0.70 | 0.73 |
| Minhou      | 0.93 | 0.96 | 0.54 |
| Minqing     | 1.16 | 0.97 | 0.60 |
| Sanming     | 1.10 | 0.84 | 0.68 |
| Ninghua     | 1.12 | 0.81 | 0.71 |
| Yongan      | 1.26 | 1.04 | 0.59 |
| Shaxian     | 0.97 | 0.82 | 0.66 |
| Qingliu     | 1.23 | 0.98 | 0.63 |
| Liancheng   | 1.31 | 1.11 | 0.56 |
| Guangze     | 1.13 | 0.86 | 0.68 |
| Nanping     | 0.98 | 0.75 | 0.71 |
| Jiangle     | 1.13 | 0.84 | 0.69 |
| Jianning    | 1.06 | 0.88 | 0.64 |
| Shaxi       | 1.26 | 0.96 | 0.67 |
| Taining     | 1.16 | 0.89 | 0.66 |
| Shaowu      | 1.15 | 0.92 | 0.64 |
| Shunchang   | 1.11 | 0.78 | 0.73 |
| Jianou      | 1.01 | 0.80 | 0.68 |
| Jianyang    | 1.13 | 0.89 | 0.65 |
| Zhenghe     | 1.11 | 0.96 | 0.59 |
| Songxi      | 1.15 | 0.90 | 0.66 |
| Wuyishan    | 1.18 | 0.83 | 0.72 |
| Pucheng     | 1.11 | 0.80 | 0.71 |

75 Table S8 Definition of evaluation criteria.

| Metric | Formula                                                                                                                                        | Optimal value | Range                     |
|--------|------------------------------------------------------------------------------------------------------------------------------------------------|---------------|---------------------------|
| CC     | $CC = \frac{\sum_{i=1}^n (O_i - \bar{O}_i)(M_i - \bar{M}_i)}{\sqrt{\sum_{i=1}^n (O_i - \bar{O}_i)^2} \sqrt{\sum_{i=1}^n (M_i - \bar{M}_i)^2}}$ | 1             | (0, 1)                    |
| PBIAS  | $PBIAS = \sum_{i=1}^n \frac{M_i - O_i}{O_i}$                                                                                                   | 0             | ( $-\infty$ , $+\infty$ ) |
| RMSE   | $RMSE = \sqrt{\frac{1}{n} \sum_{i=1}^n (M_i - O_i)^2}$                                                                                         | 0             | (0, $+\infty$ )           |
| STD    | $STD = \sqrt{\frac{1}{n} \sum_{i=1}^n (O_i - \bar{O})^2}$                                                                                      | 0             | (0, $+\infty$ )           |

76 Notes: Where  $O_i$  presents meteorological data at the  $i$  station,  $M_i$  presents data at the WRF grid  
 77 point closest to the  $i$  station,  $n$  is the numbers of stations.

78 Table S9 Parameterization scheme combinations design.

| Combinations | Microphysics scheme (MP) | Cumulus scheme (CU)       |
|--------------|--------------------------|---------------------------|
| EXP1         | WSM6                     | Betts-Miller-Janjic (BMJ) |
| EXP2         | WSM6                     | Betts-Miller-Janjic (BMJ) |
| EXP3         | WSM6                     | Betts-Miller-Janjic (BMJ) |
| EXP4         | WSM6                     | Betts-Miller-Janjic (BMJ) |
| EXP5         | WDM6                     | Kain-Fritsch (KF)         |
| EXP6         | WDM6                     | Kain-Fritsch (KF)         |
| EXP7         | WDM6                     | Kain-Fritsch (KF)         |
| EXP8         | WDM6                     | Kain-Fritsch (KF)         |
| EXP9         | Purdue Lin (Lin)         | New Tiedtke (NT)          |
| EXP10        | Purdue Lin (Lin)         | New Tiedtke (NT)          |
| EXP11        | Purdue Lin (Lin)         | New Tiedtke (NT)          |
| EXP12        | Purdue Lin (Lin)         | New Tiedtke (NT)          |
| EXP13        | Thompson                 | Grell-Devenyi (GD)        |
| EXP14        | Thompson                 | Grell-Devenyi (GD)        |
| EXP15        | Thompson                 | Grell-Devenyi (GD)        |
| EXP16        | Thompson                 | Grell-Devenyi (GD)        |

80 Table S10 Evaluation metrics for total accumulated precipitation

| Combination | TS (light) | TS (moderate) | TS (heavy) | TS (torrential) | $\overline{TS}$ | $\overline{POD}$ | $\overline{FAR}$ |
|-------------|------------|---------------|------------|-----------------|-----------------|------------------|------------------|
| EXP1        | 0.22       | 0.11          | 0.07       | 0.15            | 0.14            | 0.24             | 0.71             |
| EXP2        | 0.22       | 0.10          | 0.14       | 0.08            | 0.14            | 0.24             | 0.69             |
| EXP3        | 0.24       | 0.11          | 0.09       | 0.16            | 0.15            | 0.27             | 0.66             |
| EXP4        | 0.22       | 0.05          | 0.14       | 0.14            | 0.14            | 0.25             | 0.70             |
| EXP5        | 0.14       | 0.07          | 0.07       | 0.11            | 0.10            | 0.16             | 0.71             |
| EXP6        | 0.12       | 0.09          | 0.09       | 0.07            | 0.09            | 0.15             | 0.74             |
| EXP7        | 0.18       | 0.09          | 0.10       | 0.12            | 0.12            | 0.20             | 0.64             |
| EXP8        | 0.16       | 0.09          | 0.11       | 0.14            | 0.12            | 0.19             | 0.68             |
| EXP9        | 0.26       | 0.11          | 0.12       | 0.16            | 0.16            | 0.29             | 0.66             |
| EXP10       | 0.22       | 0.10          | 0.11       | 0.11            | 0.14            | 0.24             | 0.74             |
| EXP11       | 0.24       | 0.12          | 0.13       | 0.14            | 0.16            | 0.23             | 0.55             |
| EXP12       | 0.25       | 0.10          | 0.10       | 0.13            | 0.15            | 0.24             | 0.71             |
| EXP13       | 0.22       | 0.10          | 0.07       | 0.11            | 0.12            | 0.21             | 0.67             |
| EXP14       | 0.21       | 0.08          | 0.08       | 0.06            | 0.11            | 0.20             | 0.74             |
| EXP15       | 0.24       | 0.09          | 0.10       | 0.13            | 0.14            | 0.25             | 0.70             |
| EXP16       | 0.24       | 0.12          | 0.13       | 0.12            | 0.15            | 0.26             | 0.67             |

81 Note: TS (light rain, moderate rain, heavy rain, torrential rain) refers to the average of daily 24-hour  
 82 accumulated precipitation.  $\overline{TS}$ ,  $\overline{POD}$  and  $\overline{FAR}$  represent the average values of the scores for the  
 83 four precipitation levels.

84 **Figure**

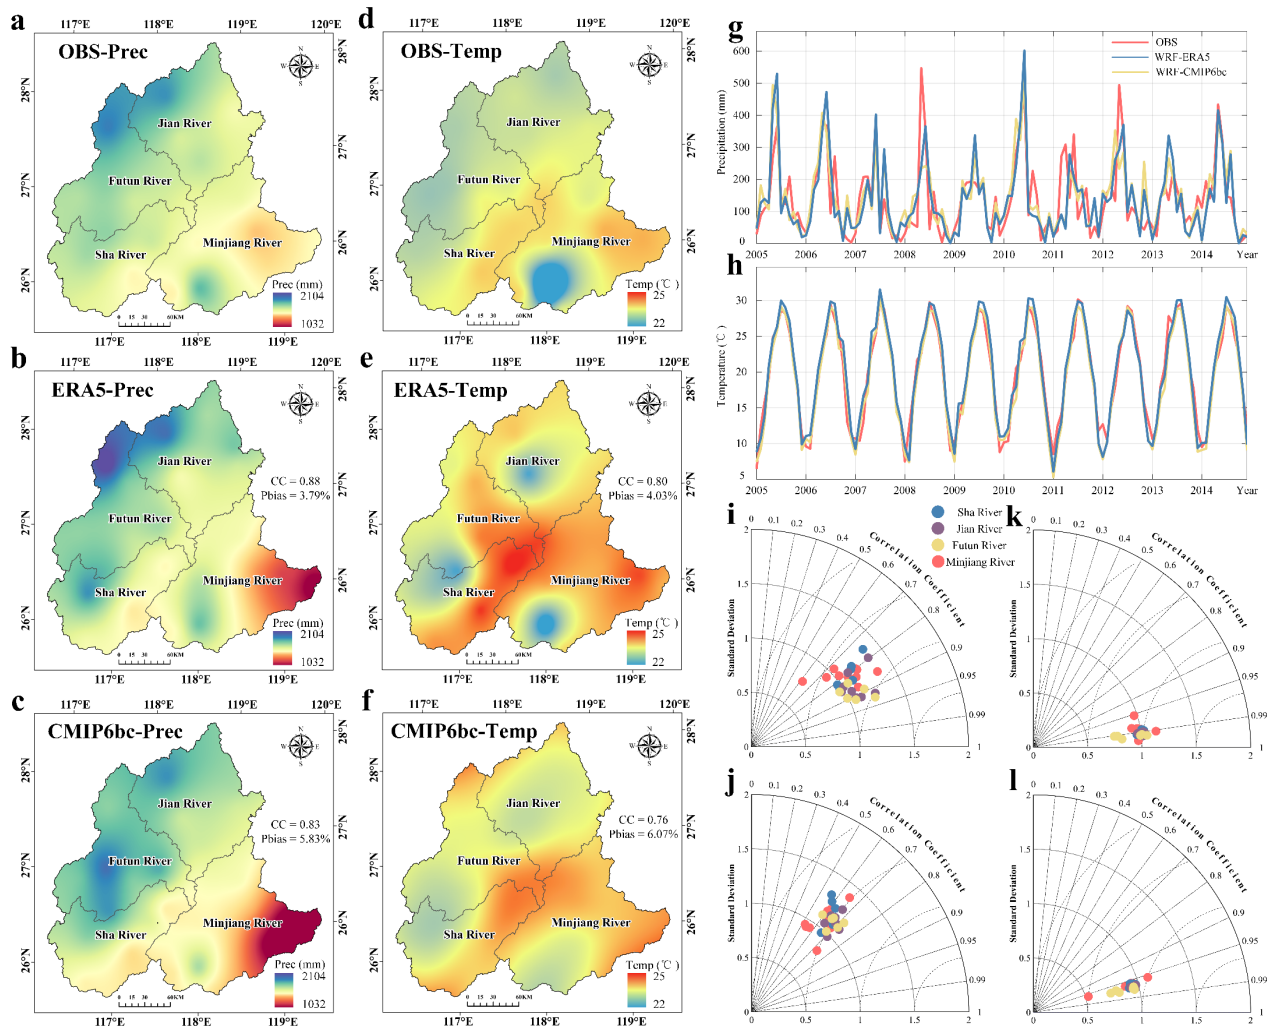

85

86 Figure S1. Evaluation of WRF-simulated precipitation and temperature over the MRB (2005-2014).  
 87 spatial patterns of precipitation (a–c), temperature (d–f). Temporal evolution of precipitation (g) and  
 88 temperature (h). Panels (i–l) present sub-basin comparisons of precipitation and temperature from  
 89 ERA5 (i, k) and CMIP6bc (j, l).

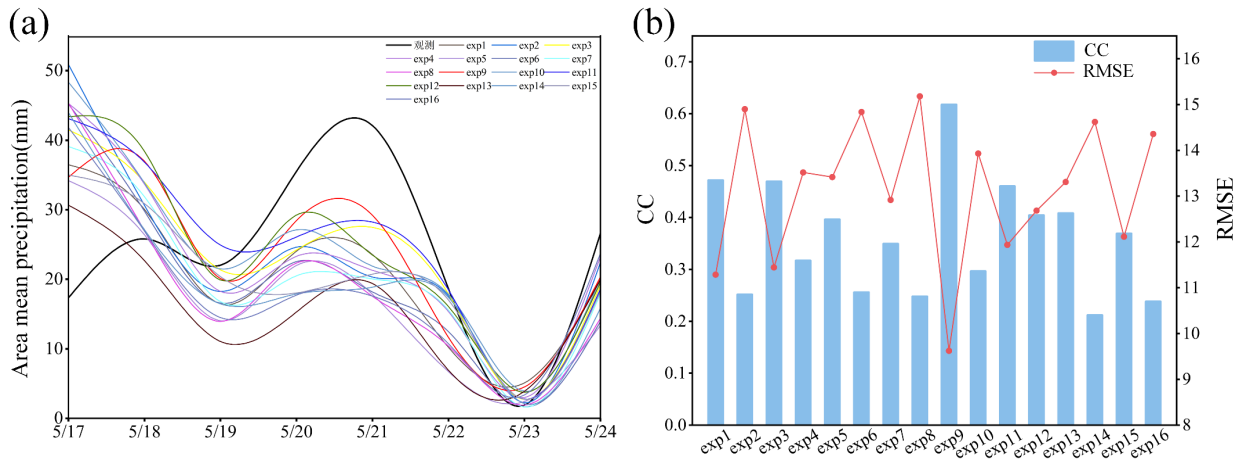

90

91 Figure S2. Time series of observations and WRF simulation.

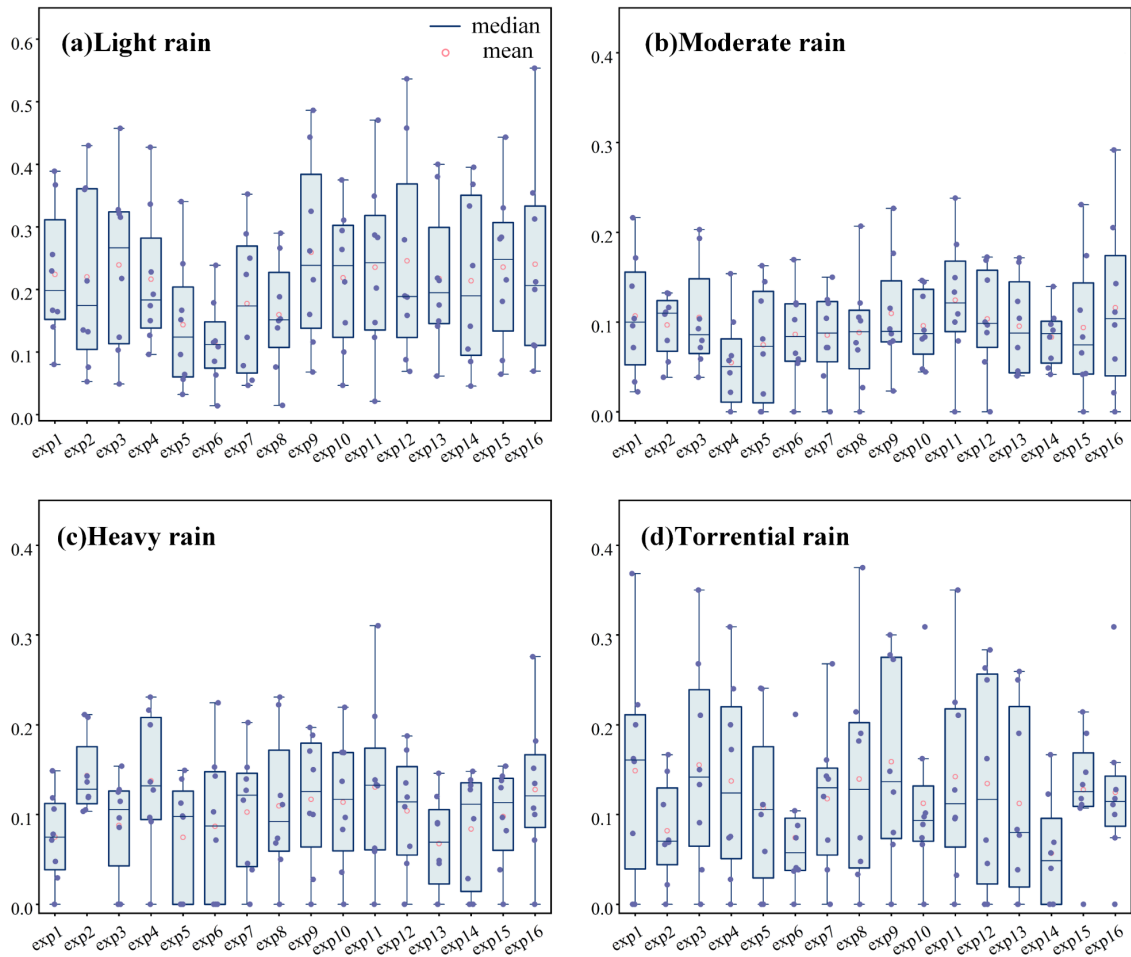

92

93 Figure S3. Box plot of TS scores for 24-hour accumulated precipitation simulated by WRF.

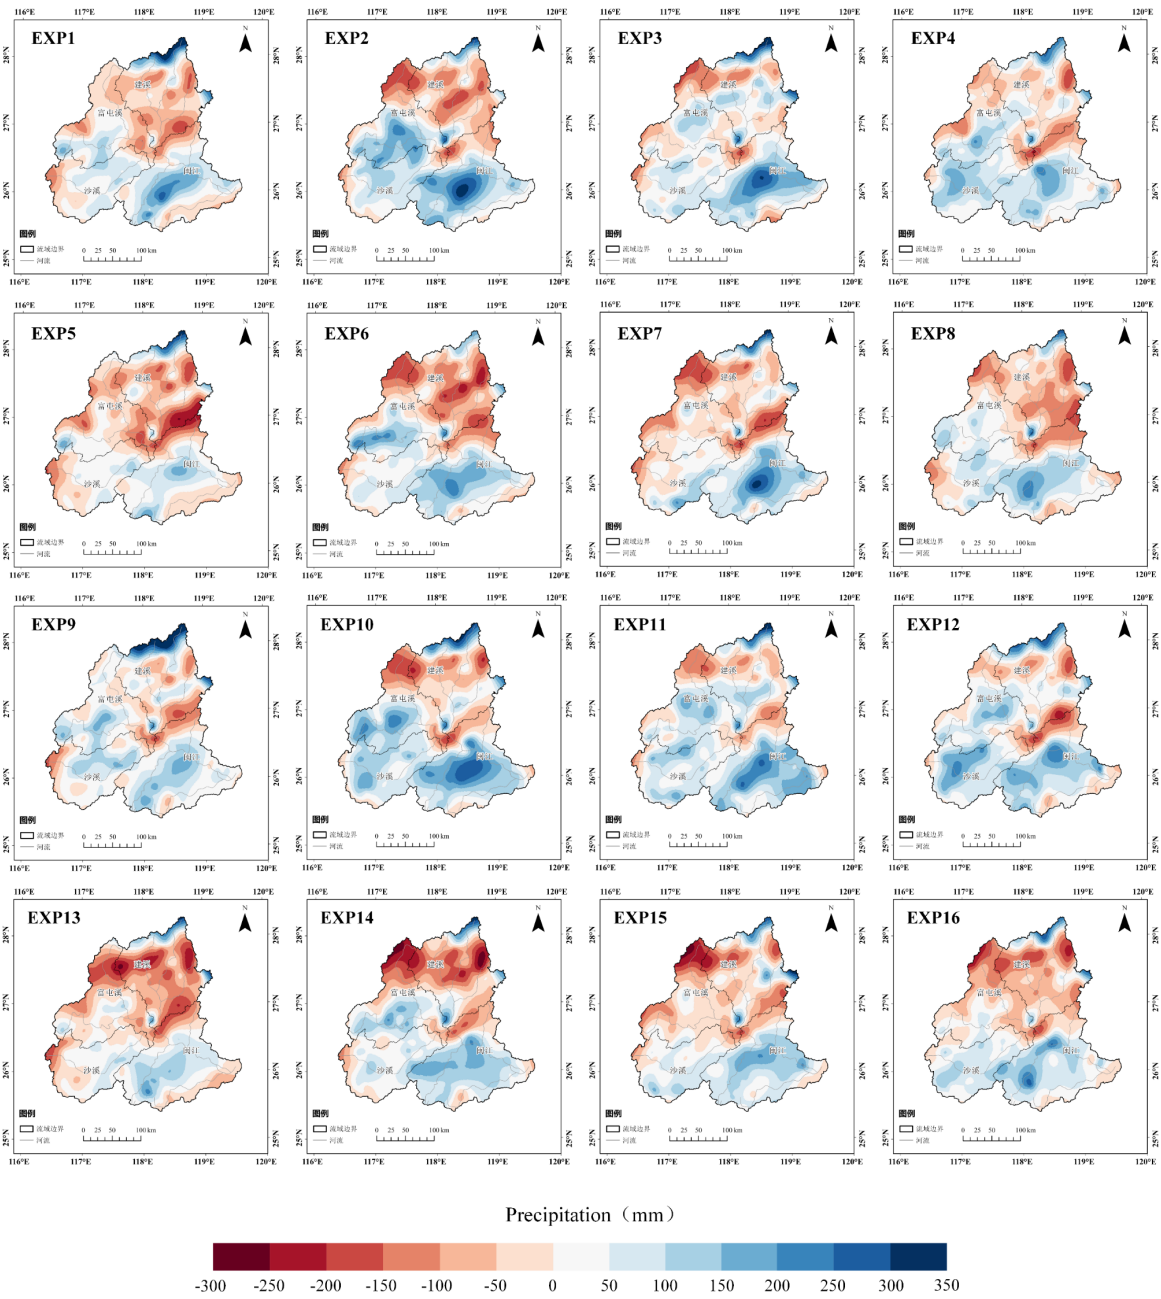

94

95 Figure S4. Spatial distribution of biases of total accumulated precipitation from WRF  
 96 parametrization scheme sensitivity experiments.

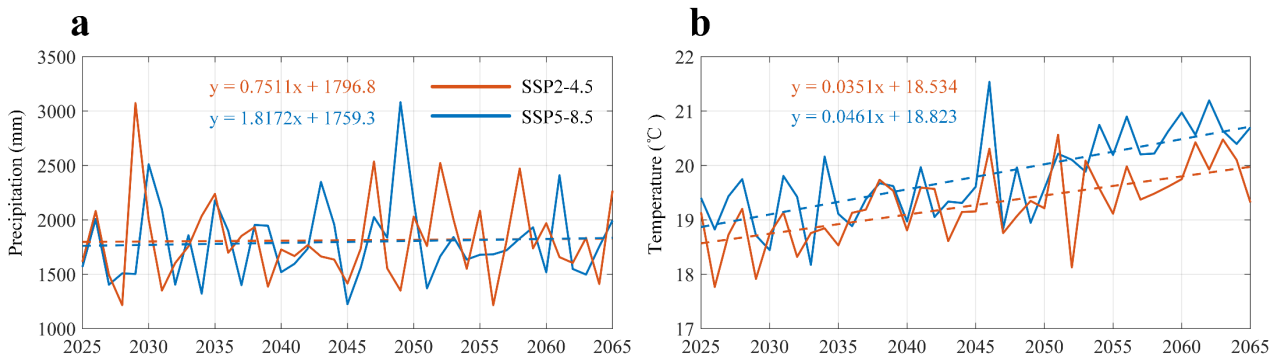

97

98 Figure S5. Variation of in annual precipitation (a) and temperature (b) in MRB from 2025 to 2065.

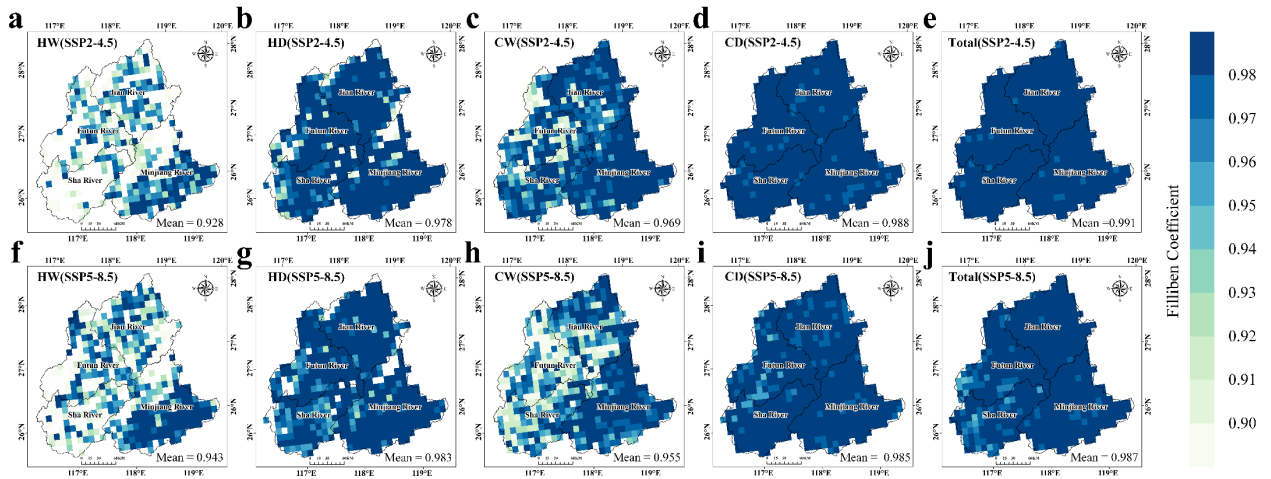

99

100 Figure S6. Maps of the Filliben Coefficient for CCEs.

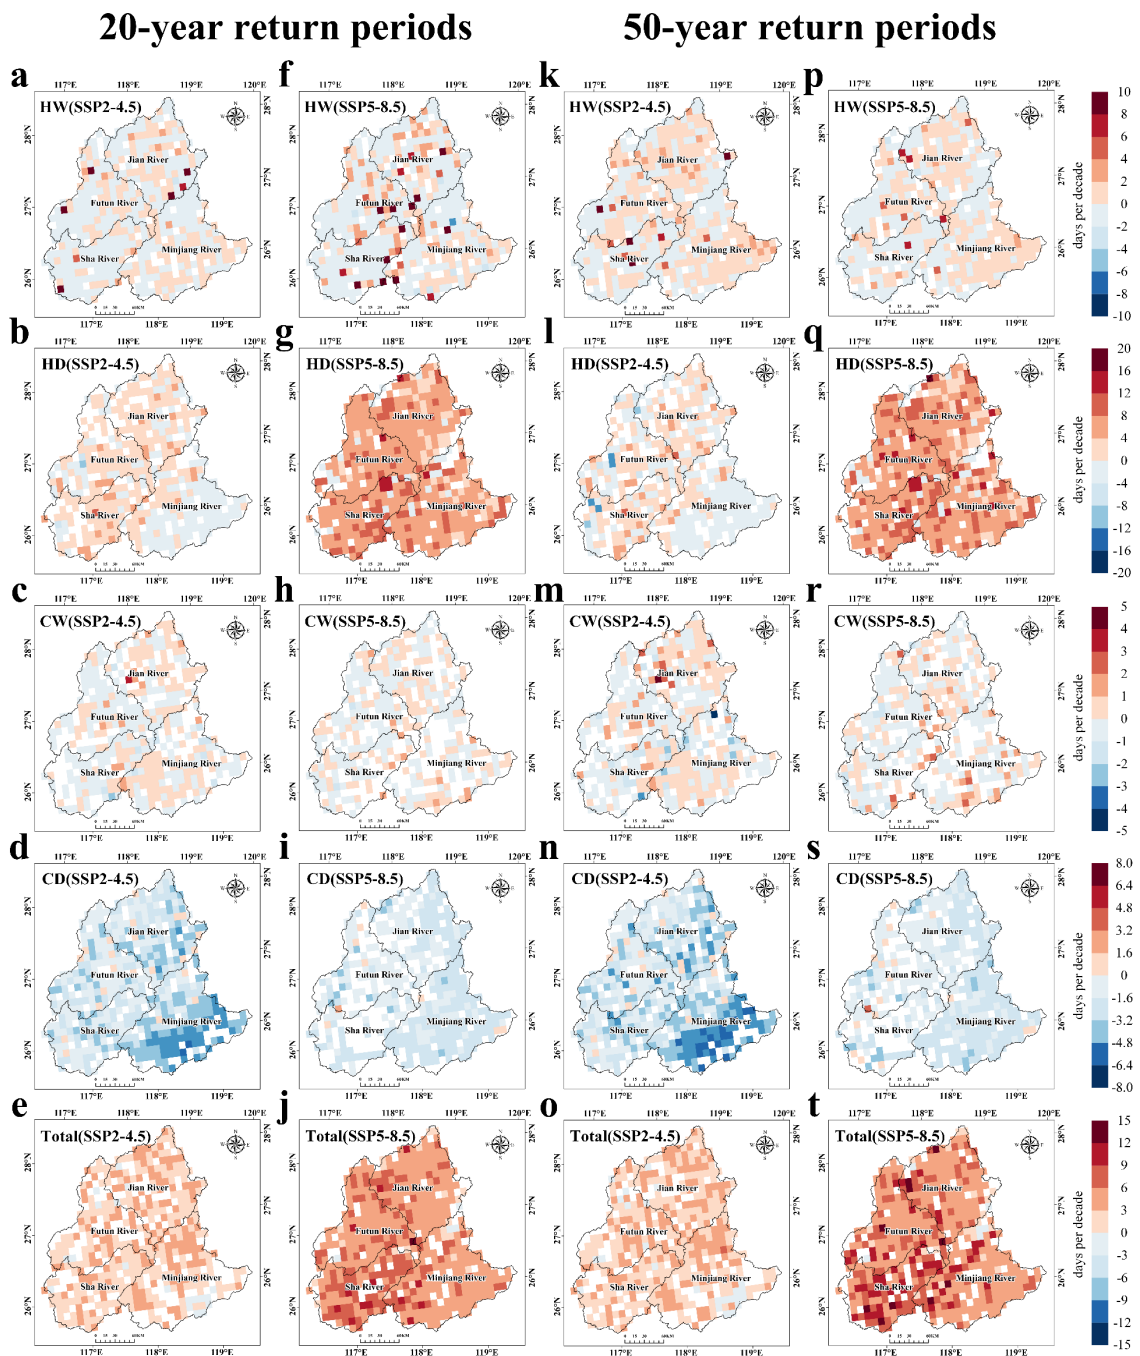

101

102 Figure S7. As in Figure 7 but for 20- and 50- return periods.

103 **References**

- 104 Chen, G., Mei, S.-J., Hang, J., Li, Q., and Wang, X.: URANS simulations of urban microclimates:  
105 Validated by scaled outdoor experiments, *Building and Environment*, 272, 112691,  
106 <https://doi.org/10.1016/j.buildenv.2025.112691>, 2025.
- 107 Huang, N. E., Shen, Z., Long, S. R., Wu, M. C., Shih, H. H., Zheng, Q., Yen, N.-C., Tung, C. C., and  
108 Liu, H. H.: The empirical mode decomposition and the Hilbert spectrum for nonlinear and non-  
109 stationary time series analysis, *Proc. R. Soc. Lond. A*, 454, 903–995,  
110 <https://doi.org/10.1098/rspa.1998.0193>, 1998.
- 111 Lee, T. and Ouarda, T. B. M. J.: Long - term prediction of precipitation and hydrologic extremes  
112 with nonstationary oscillation processes, *J. Geophys. Res.*, 115, 2009JD012801,  
113 <https://doi.org/10.1029/2009JD012801>, 2010.
- 114 Lin, S., Zhang, Y., Sun, S., Guan, X., Jiang, C., Gao, L.: Sensitivity study of WRF parameterization  
115 schemes and initial fields on simulation of rainstorm in the Minjiang River basin. *Pearl River*  
116 (in Chinese) 44(10):35-46+61. [https://doi: 10.3969/j.issn.1001-9235.2023.10.004](https://doi.org/10.3969/j.issn.1001-9235.2023.10.004), 2023.
- 117 Min, Y., Huang, W., Ma, M., and Zhang, Y.: Simulations in the Topography Effects of Tianshan  
118 Mountains on an Extreme Precipitation Event in the Ili River Valley, China, *Atmosphere*, 12,  
119 750, <https://doi.org/10.3390/atmos12060750>, 2021.
- 120 Qian, C.: On trend estimation and significance testing for non-Gaussian and serially dependent data:  
121 quantifying the urbanization effect on trends in hot extremes in the megacity of Shanghai, *Clim.*  
122 *Dyn.*, 47, 329–344, <https://doi.org/10.1007/s00382-015-2838-0>, 2016.
- 123 Varga, Á. J. and Breuer, H.: Sensitivity of simulated temperature, precipitation, and global radiation  
124 to different WRF configurations over the Carpathian Basin for regional climate applications,  
125 *Clim. Dyn.*, 55, 2849–2866, <https://doi.org/10.1007/s00382-020-05416-x>, 2020.
- 126 Wang, Y., Yang, K., Zhou, X., Chen, D., Lu, H., Ouyang, L., Chen, Y., Lazhu, and Wang, B.: Synergy  
127 of orographic drag parameterization and high resolution greatly reduces biases of WRF-  
128 simulated precipitation in central Himalaya, *Clim. Dyn.*, 54, 1729–1740,  
129 <https://doi.org/10.1007/s00382-019-05080-w>, 2020.
- 130 Wu, J., Wang, Z., Dong, J., Cui, X., Tao, S., and Chen, X.: Robust Runoff Prediction with  
131 Explainable Artificial Intelligence and Meteorological Variables from Deep Learning Ensemble  
132 Model, *Water Resour. Res.*, 59, e2023WR035676, <https://doi.org/10.1029/2023WR035676>,  
133 2023b.
